# Supplementary material for: An accurate full-dimensional H4O potential energy surface and dynamics of an exchange reaction
Source: Royal Society of Chemistry journal article supplement (doi:10.1039/d2cp04521d), 2022-01-01

# **An Accurate Full-Dimensional H<sub>4</sub>O Potential Energy Surface and Dynamics of Exchange Reaction H<sub>2</sub> + H'<sub>2</sub>O → HH' + HOH'**

Jia Li,<sup>1</sup> Yang Liu,<sup>1,2</sup> Hua Guo,<sup>3</sup> and Jun Li<sup>1\*</sup>

<sup>1</sup>*School of Chemistry and Chemical Engineering & Chongqing Key Laboratory of Theoretical and Computational Chemistry, Chongqing University, Chongqing 401331, China*

<sup>2</sup>*State Key Laboratory of Molecular Reaction Dynamics, Dalian Institute of Chemical Physics, Chinese Academy of Sciences, Dalian, 116023, China*

<sup>3</sup>*Department of Chemistry and Chemical Biology, University of New Mexico, Albuquerque, New Mexico, 87131, USA*

## ***Supporting Information***

---

\* Corresponding author, E-mail: [jli15@cqu.edu.cn](mailto:jli15@cqu.edu.cn)

**Figure S1.** (a) Potential energy as a function of the H-H bond length for  $\text{H}_2\cdots\text{H}_2\text{O}$ , which are calculated at the level of CCSD(T)-F12a/AVTZ for  $0.4 \text{ \AA} \leq r_{\text{H-H}} \leq 4 \text{ \AA}$  and MRCI-F12+Qrot/AVTZ for  $r_{\text{H-H}} \geq 2 \text{ \AA}$ . (b) Potential energy as a function of an O-H bond length for  $\text{H}_2\cdots\text{H}_2\text{O}$ , which are calculated by CCSD(T)-F12a/AVTZ for  $0.65 \text{ \AA} \leq r_{\text{O-H}} \leq 4 \text{ \AA}$  and MRCI-F12+Qrot/AVTZ for  $r_{\text{O-H}} \geq 2 \text{ \AA}$ .

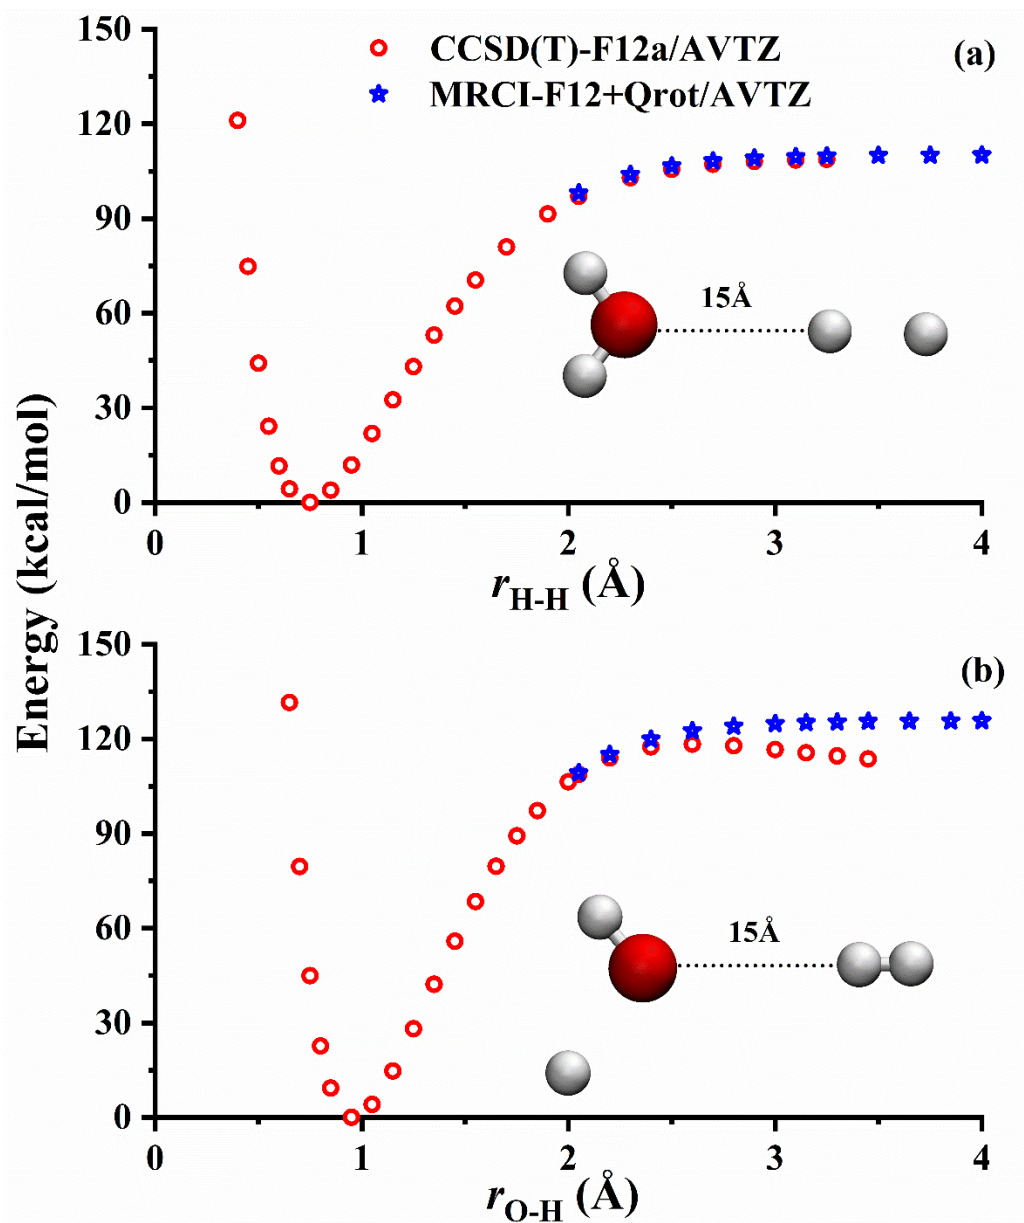

**Figure S2.** (a) One-dimensional cuts for nine normal coordinates of the transition state, and the points are the results by ab initio calculation. (b) The normal mode vector corresponding to each vibration mode of the transition state.

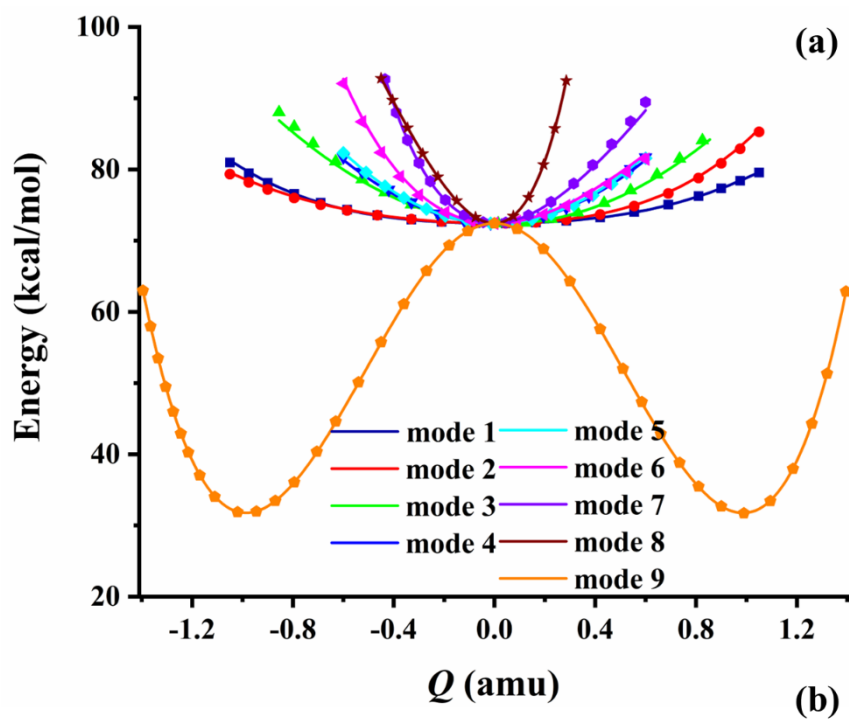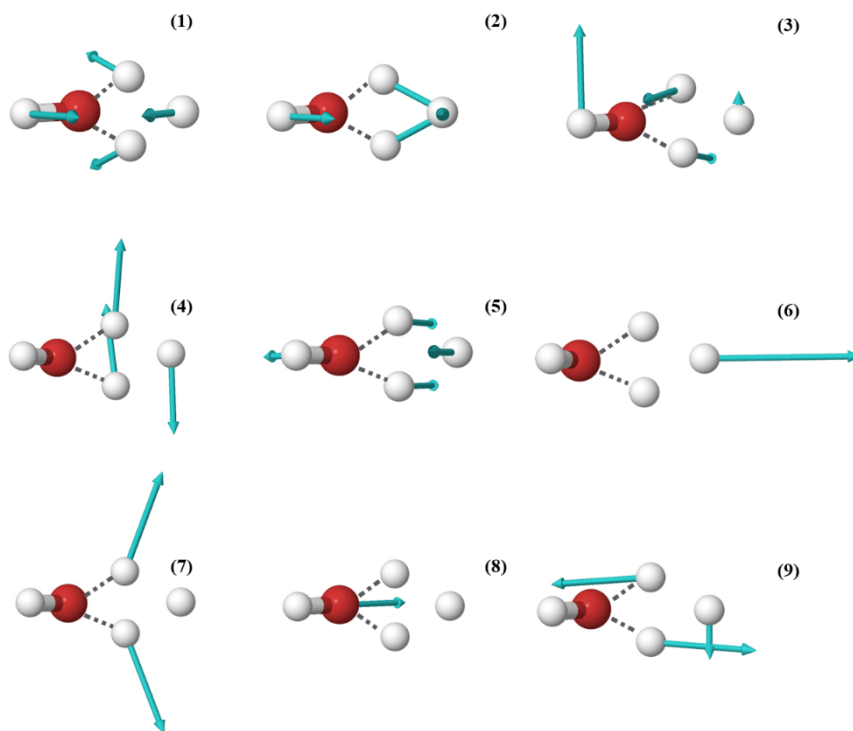

Supplement: d2cp04521d1.pdf [file d2cp04521d1.pdf]
